# Supplementary material
Source: PubMed Central journal article supplement (PMC4825117)
Supplement: supp_pp.15.01827_PP2015-01827DR3_Supplemental_Material.pdf [file supp_pp.15.01827_PP2015-01827DR3_Supplemental_Material.pdf]

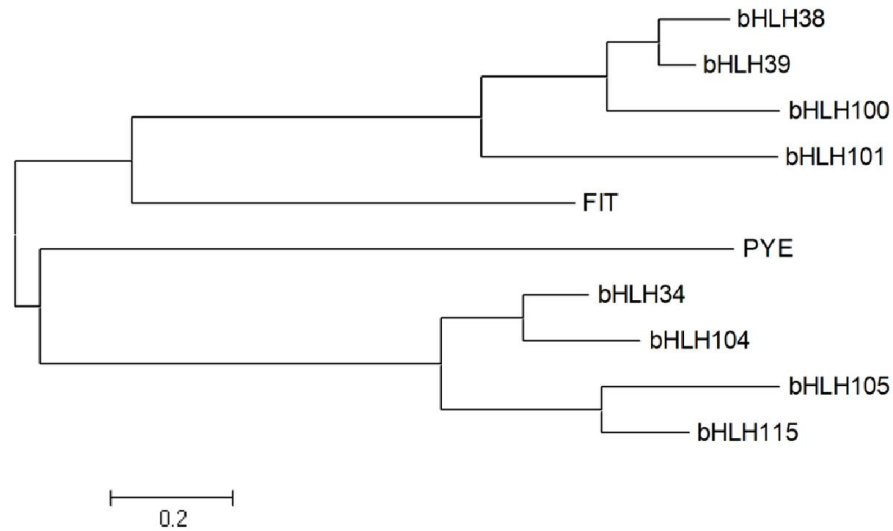

**Supplemental Figure 1.** Phylogenetic tree of bHLH proteins involved in Fe homeostasis. The protein sequences were retrieved from TAIR (The Arabidopsis Information Resource). Sequences were aligned by Clustal X1.5. The phylogenetic tree was constructed by MEGA 3.1.

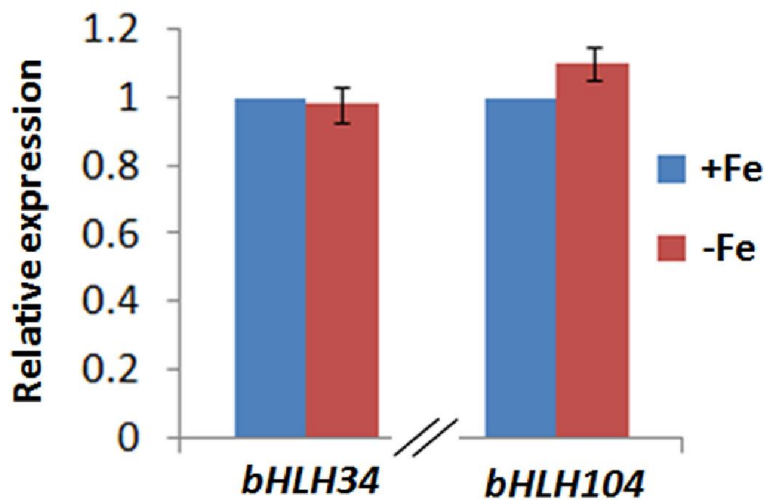

**Supplemental Figure 2.** Expression of *bHLH34* and *bHLH104* in response to Fe deficiency. 10-day-old wild type seedlings grown on +Fe media were transferred to +Fe media or -Fe media for 3 days. Roots were harvested for the extraction of RNA and qRT-PCR. Values are means ( $\pm$  SD) of three technical repeats from one of three biological repeats.

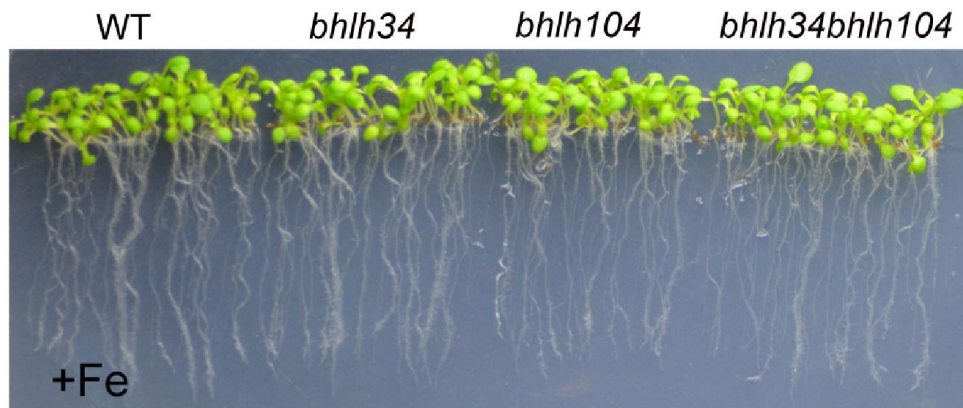

**Supplemental Figure 3.** Growth status of wild-type and mutant plants. 10-day-old seedlings grown on +Fe media.

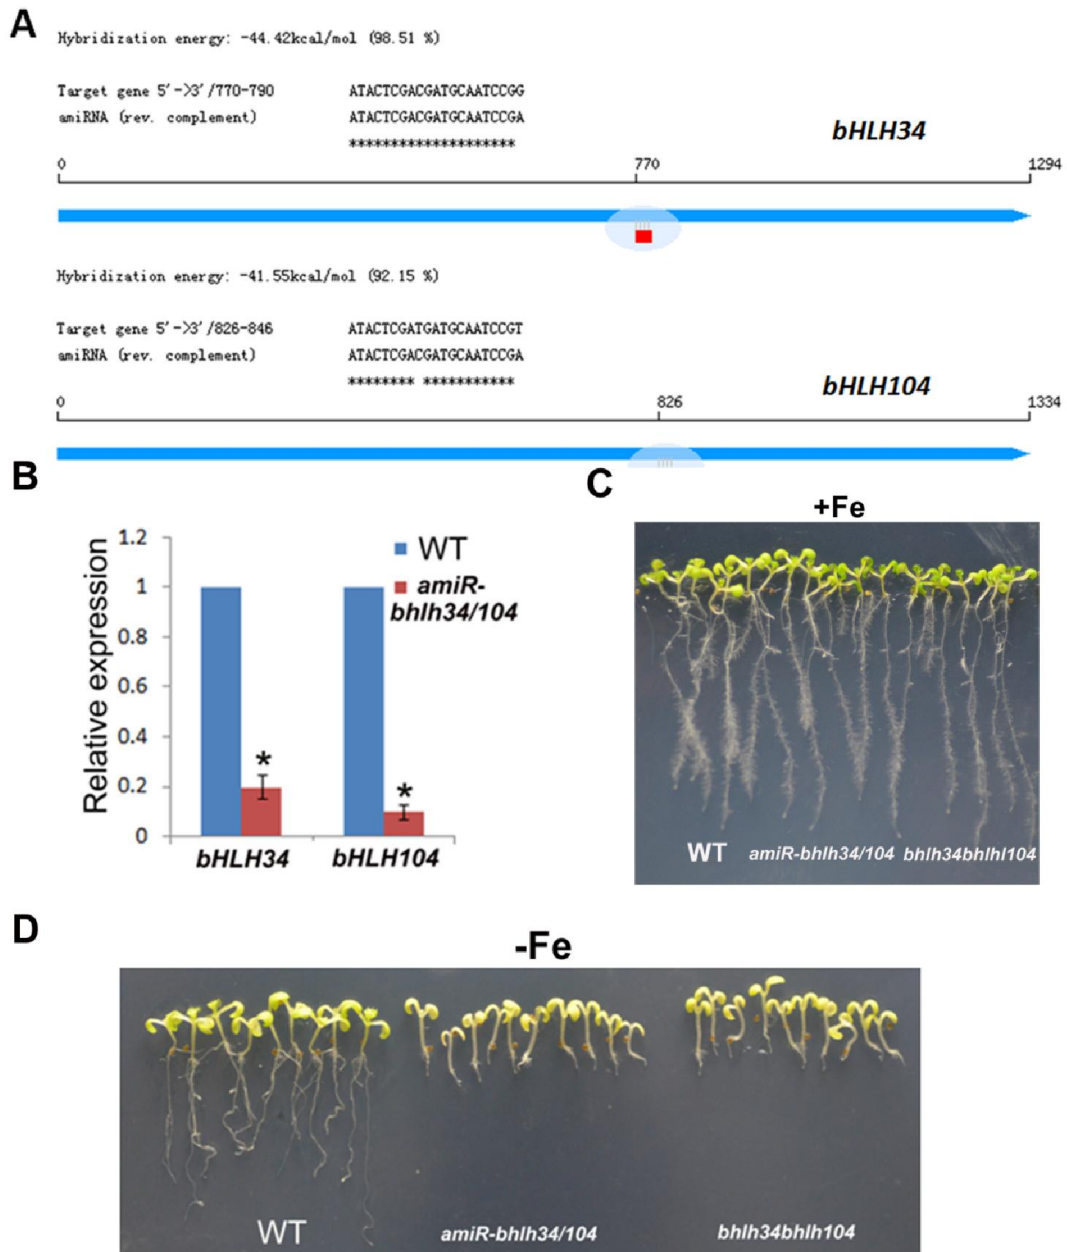

**Supplemental Figure 4.** Analysis of *amiR-bhlh34/104* and double mutant plants.

(A) The target site of *amiR-bhlh34/104* in *bHLH34* and *bHLH104*.

(B) Relative expression levels of *bHLH34* and *bHLH104* in *amiR-bhlh34/104* plants. Significant differences from the wild type are indicated by \* ( $P < 0.05$ ).

(C) 10-day-old seedlings grown on +Fe media.

(D) 10-day-old seedlings grown on -Fe media.

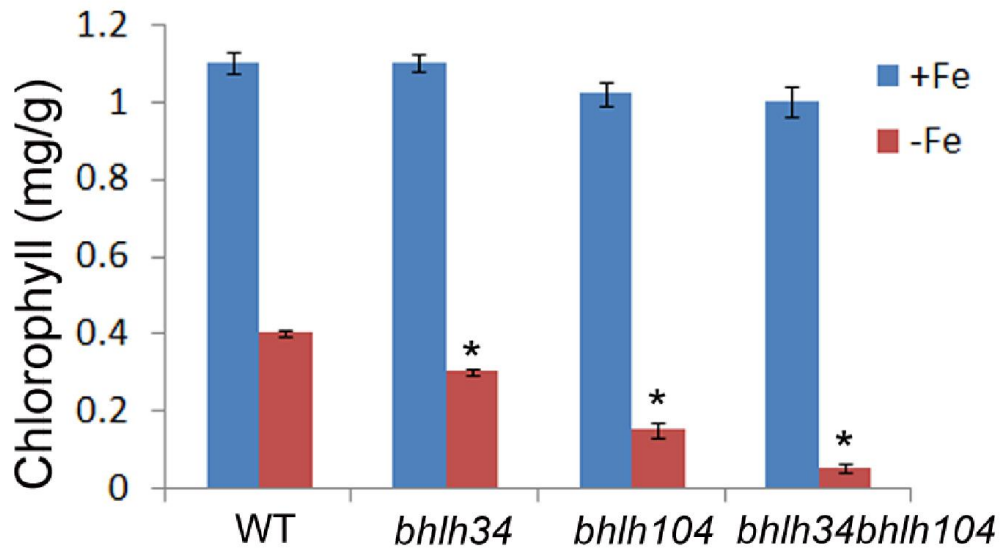

**Supplemental Figure 5.** Chlorophyll content of mutant seedlings on +Fe or -Fe media. Values are means ( $\pm$ SD) of three technical repeats from one of three biological repeats. Significant differences from the wild type are indicated by \* ( $P < 0.05$ ).

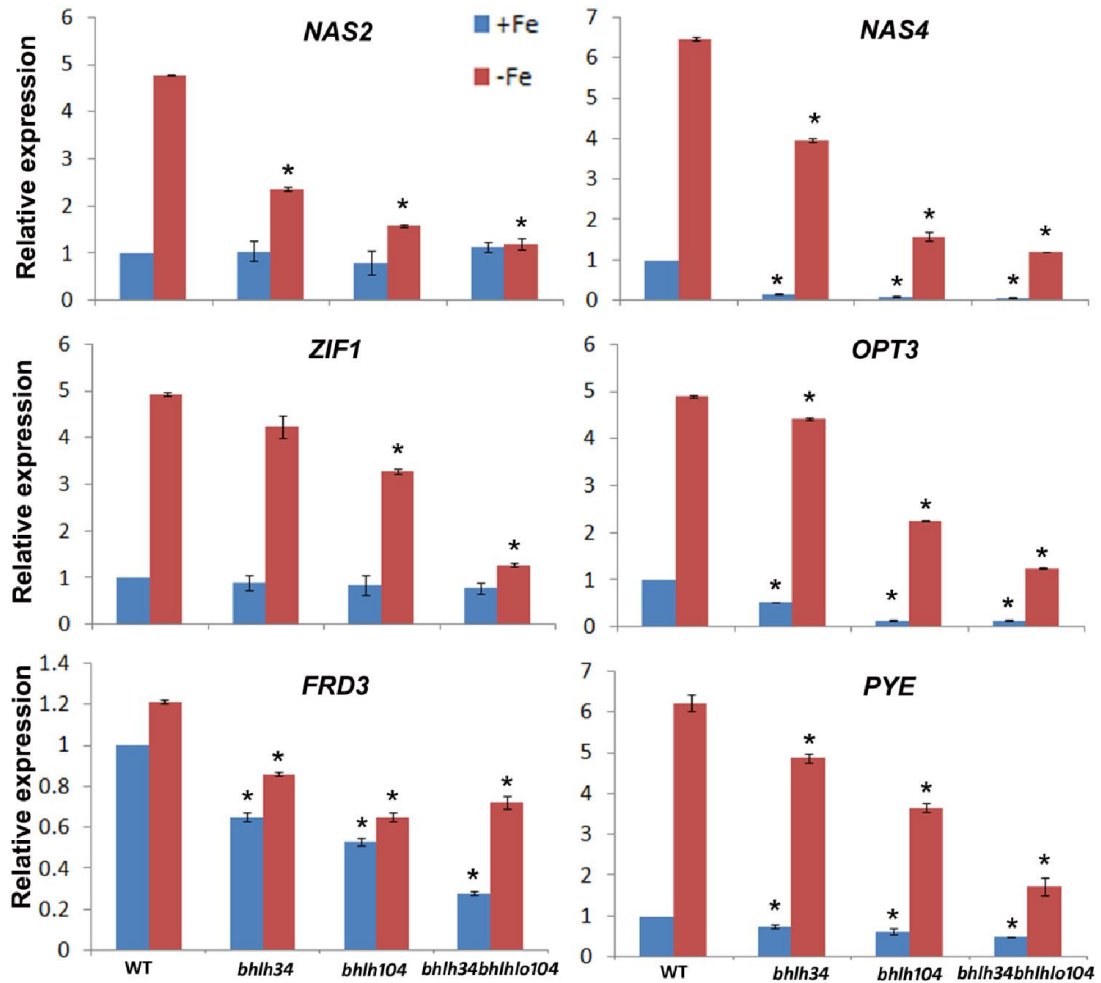

**Supplemental Figure 6.** *NAS2*, *NAS4*, *ZIF1*, *FRD3*, *OPT3* and *PYE* transcript levels in various mutant plants. Wild-type and mutant plants were grown on +Fe media for 10 days, then transferred to +Fe or -Fe media for 3 days. RNA was prepared from root tissues. The data represent means ( $\pm$ SD) of three technical repeats from one of three biological repeats. Significant differences from the wild type are indicated by \* ( $P < 0.05$ ).

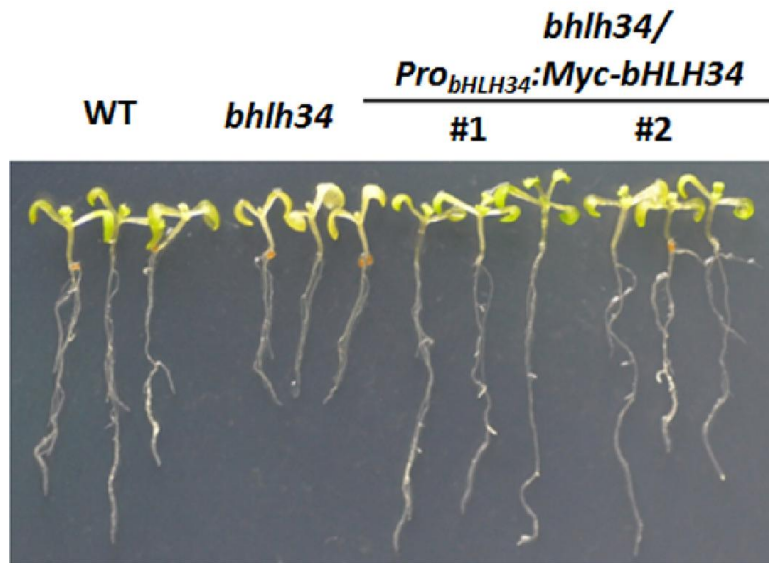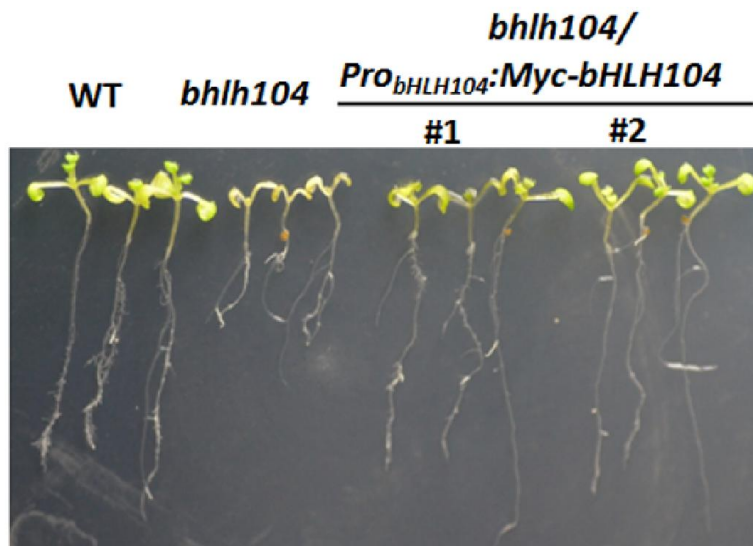

**Supplemental Figure 7.** Complementation of *bhlh34* and *bhlh104* mutants. 10-day-old seedlings grown on -Fe media were shown.

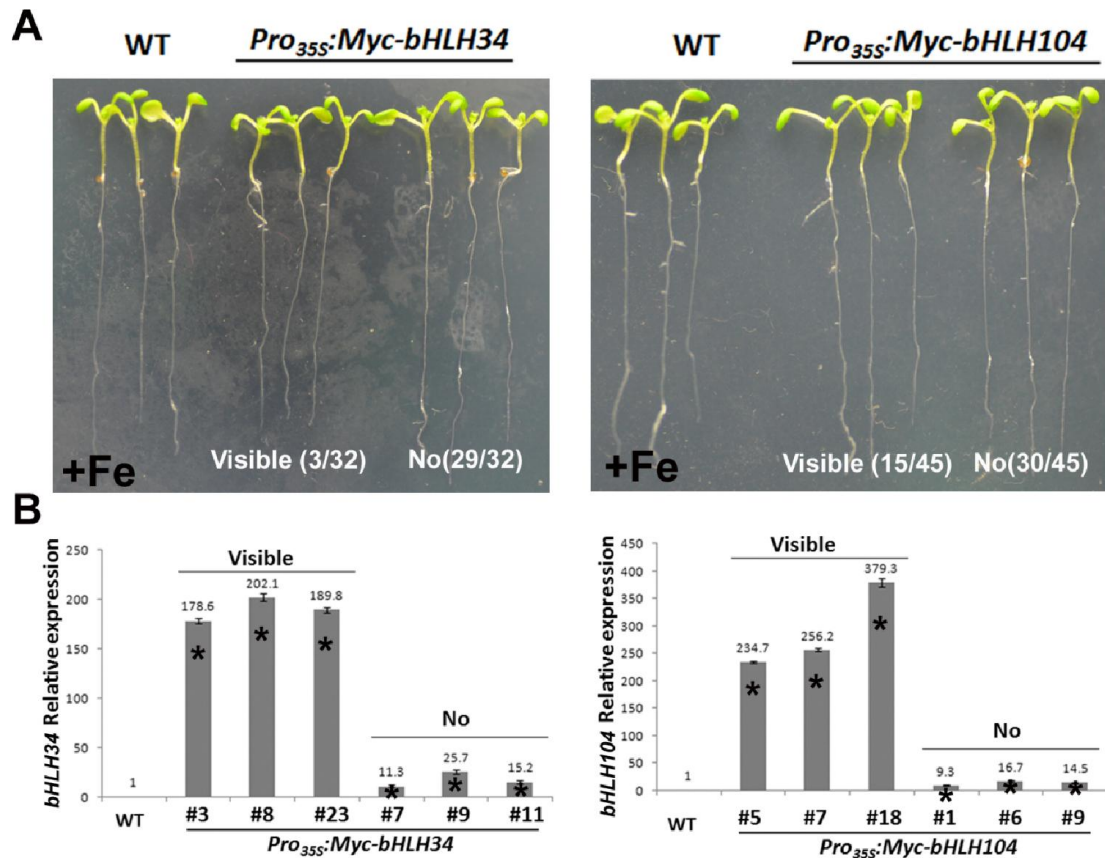

**Supplemental Figure 8.** Analysis of *bHLH34* and *bHLH104* overexpression plants.

(A) 10-day-old seedlings germinated directly on +Fe media. “Visible” indicates the plants with visible phenotypes (short roots and leaf chlorosis) in normal soils or on –Fe media. “No” indicates the plants with phenotypes similar to wild type on in normal soils or –Fe media.

(B) Relative expression of *bHLH34* and *bHLH104* in overexpression plants. RNA was prepared from shoot tissues of 10-day-old seedlings grown on +Fe media. The data represent means ( $\pm$ SD) of three technical repeats from one of three biological repeats. Significant differences from the wild type are indicated by \* ( $P < 0.05$ ).

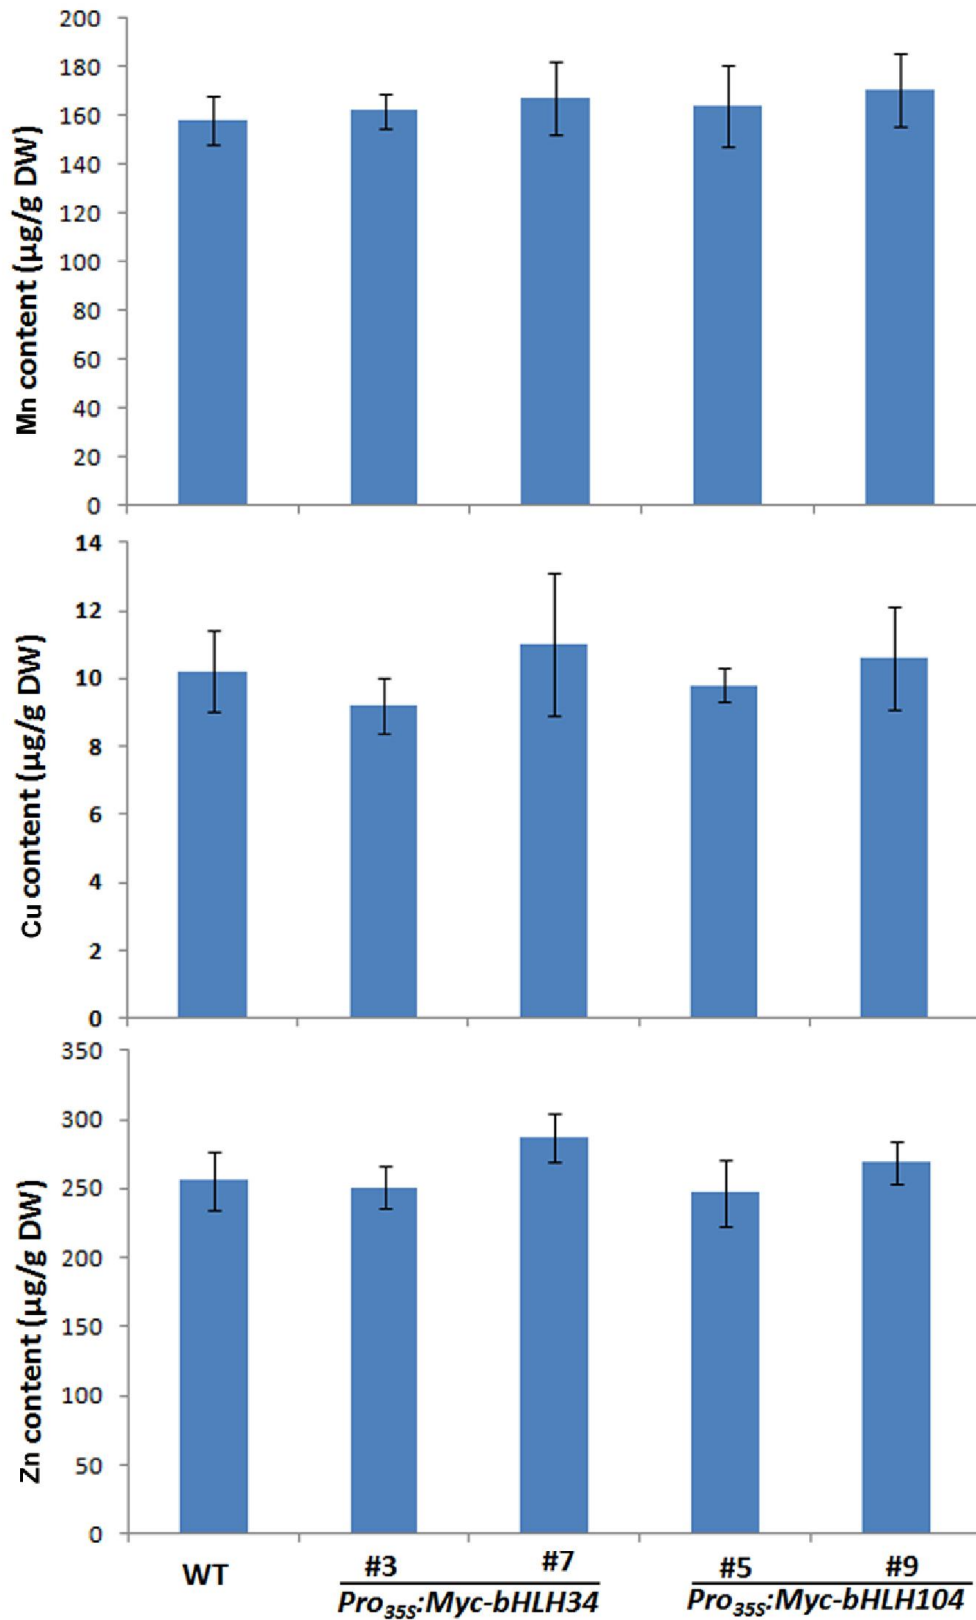

**Supplemental Figure 9.** Concentration of other metals in overexpression plants. Leaves of 4-week-old plants grown in normal soils were used for metal content measurement.



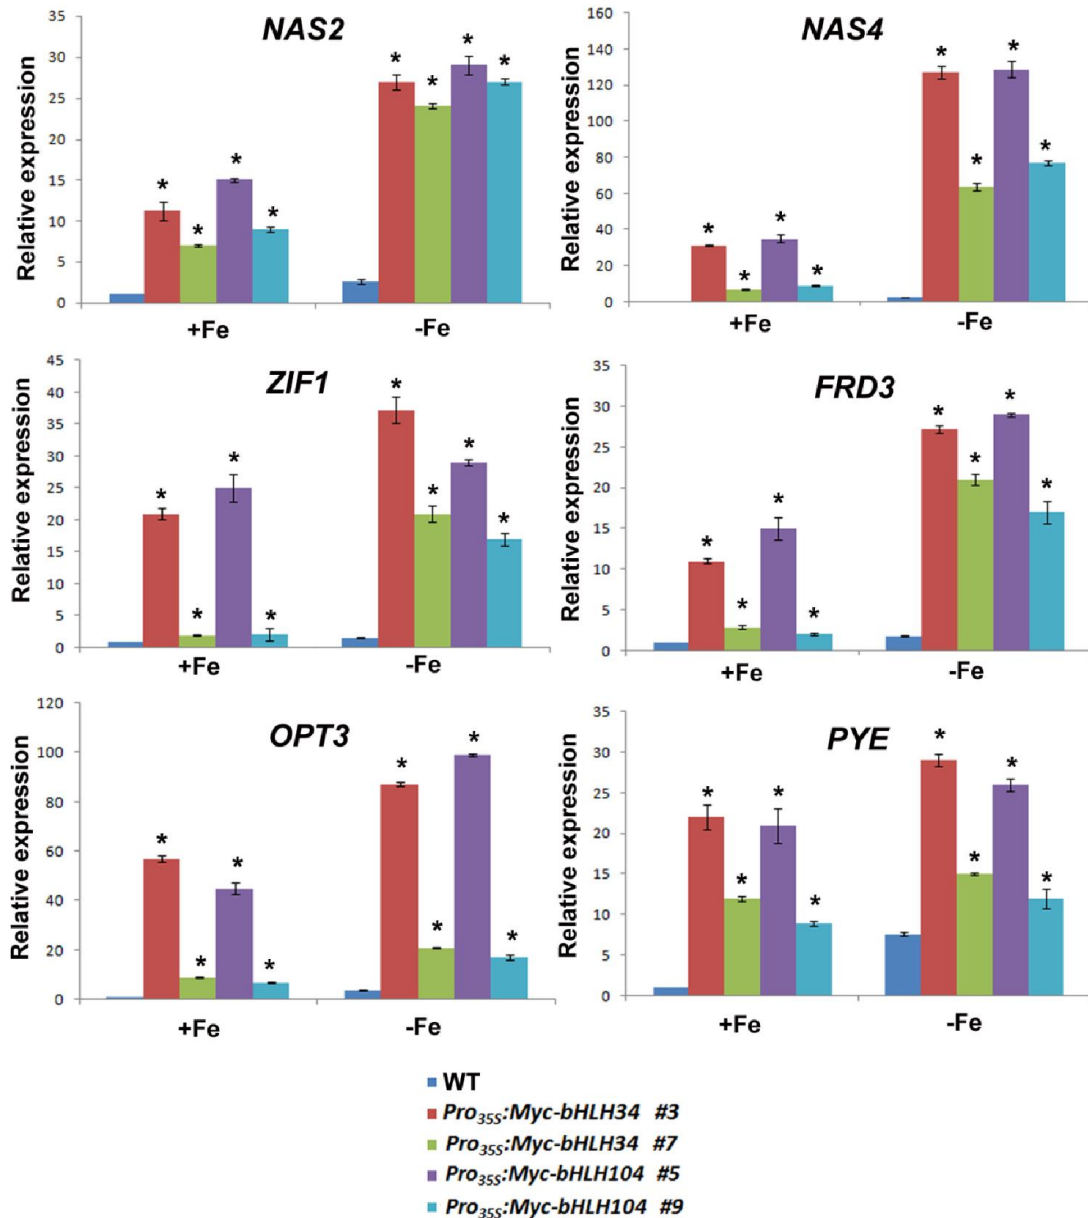

**Supplemental Figure 10.** *NAS2*, *NAS4*, *ZIF1*, *FRD3*, *OPT3* and *PYE* transcript levels in overexpression plants. Wild-type and overexpression plants were grown on +Fe media for 10 days, then transferred to +Fe or -Fe media for 3 days. RNA was prepared from root tissues. The data represent means ( $\pm$  SD) of three technical repeats from one of three biological repeats. Significant differences from the wild type are indicated by \* ( $P < 0.05$ ).

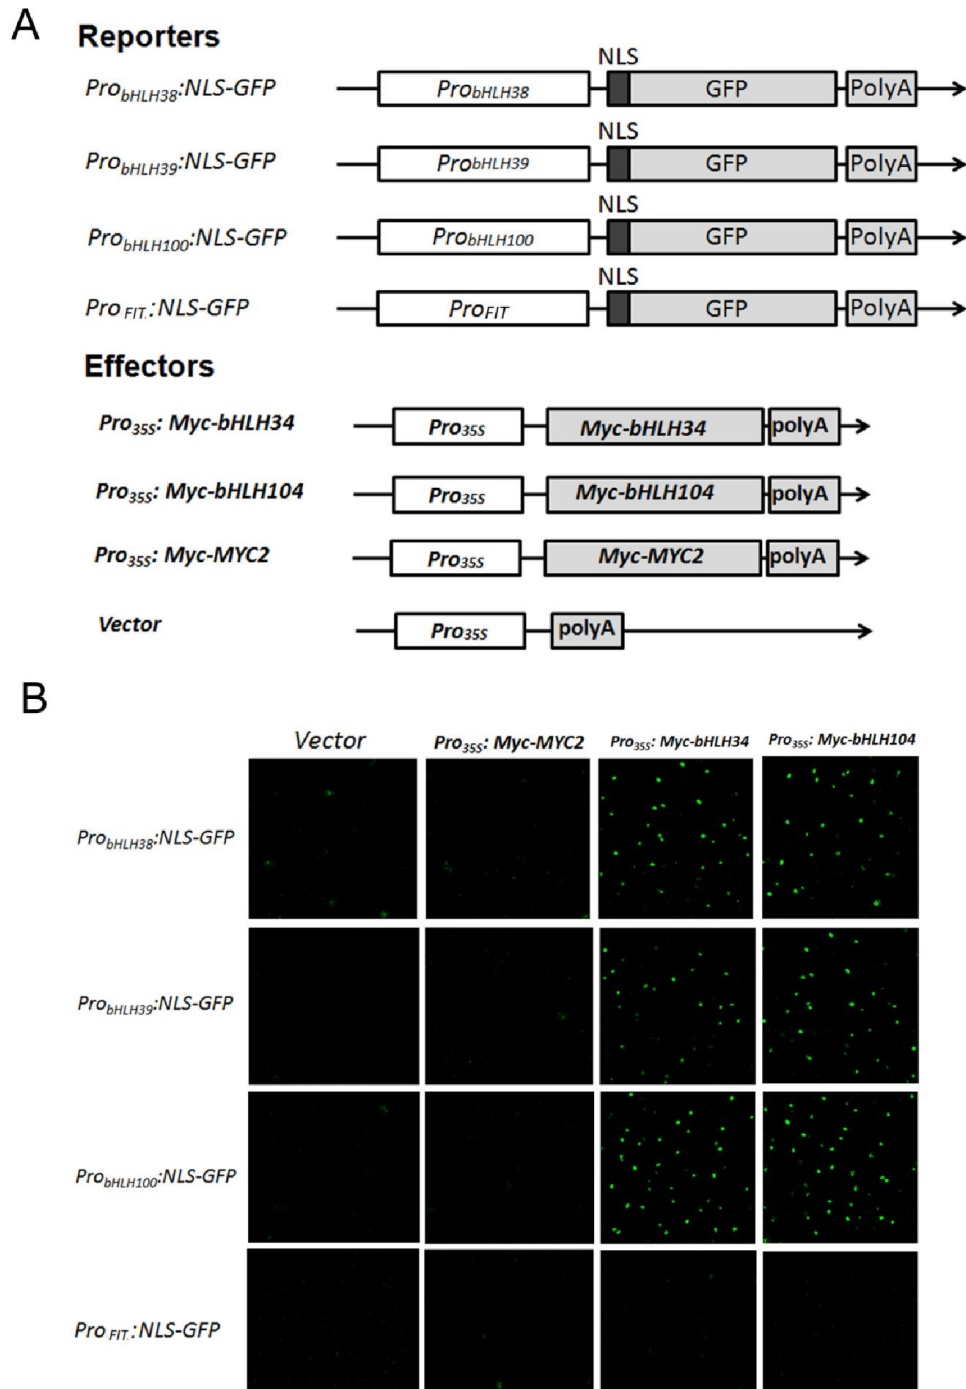

**Supplemental Figure 11.** bHLH34 and bHLH104 activate the promoter of *bHLH38/39/100*.

(A) Schematic representation of the constructs used for transient expression assays. The reporter construct consists of *bHLH38/39/100/FIT* promoter, NLS sequence fused with *GFP* coding sequence, and polyA terminator. Effector constructs express *Myc-bHLH34*, *Myc-bHLH104*, or *Myc-MYC2* under the control of the CaMV 35S promoter.

(B) bHLH34 and bHLH104 activate the promoter of *bHLH38/39/100* in transient expression assays. The results are one representative of three biological repeats

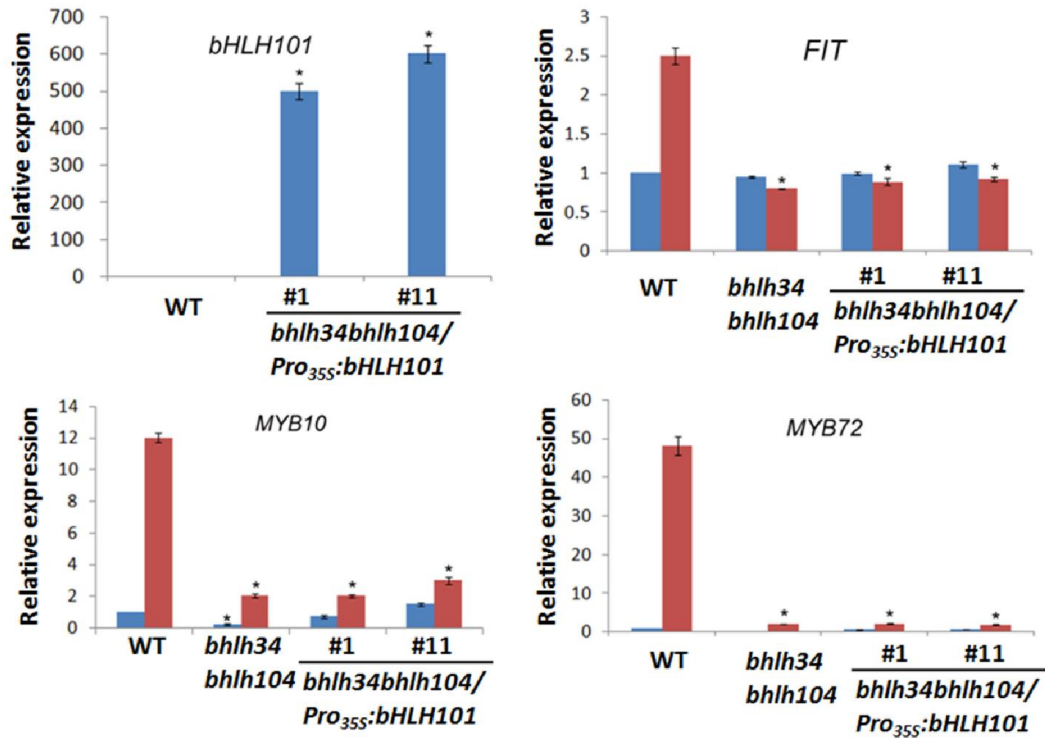

**Supplemental Figure 12.** Analysis of *bhlh34bhlh104/Pro<sub>35S</sub>:bHLH101* Plants. (A) Transcript levels of *bHLH101* in *bhlh34bhlh104/Pro<sub>35S</sub>:bHLH101* Plants. (B) (C) and (D) Transcript levels of *FIT*, *MYB10* and *MYB72* in *bhlh34bhlh104/Pro<sub>35S</sub>:bHLH101* Plants. The data represent means ( $\pm$ SD) of three technical repeats from one of three biological repeats. Significant differences from the wild type are indicated by \* ( $P < 0.05$ ).

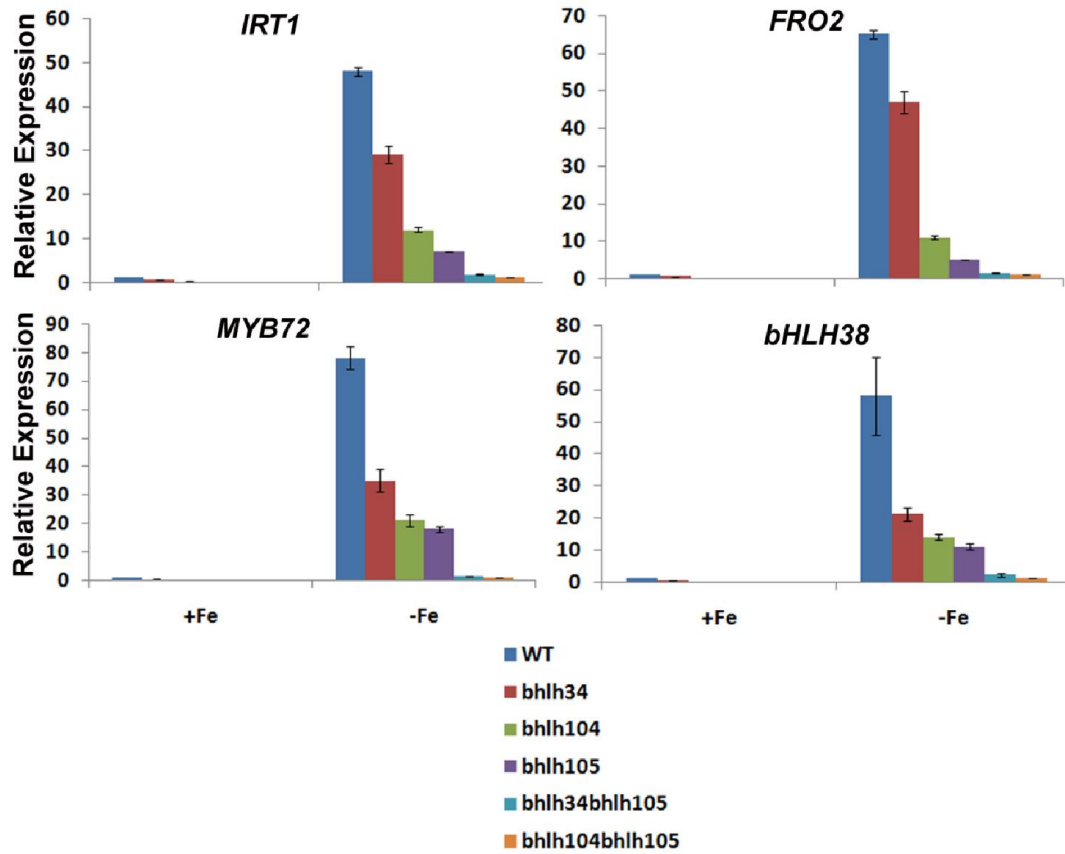

**Supplemental Figure 13.** Expression of Fe-deficient responsive genes in various single and double mutants. Wild-type and mutant plants were grown on +Fe media for 10 days, then transferred to +Fe or -Fe media for 3 days. RNA was prepared from root tissues.

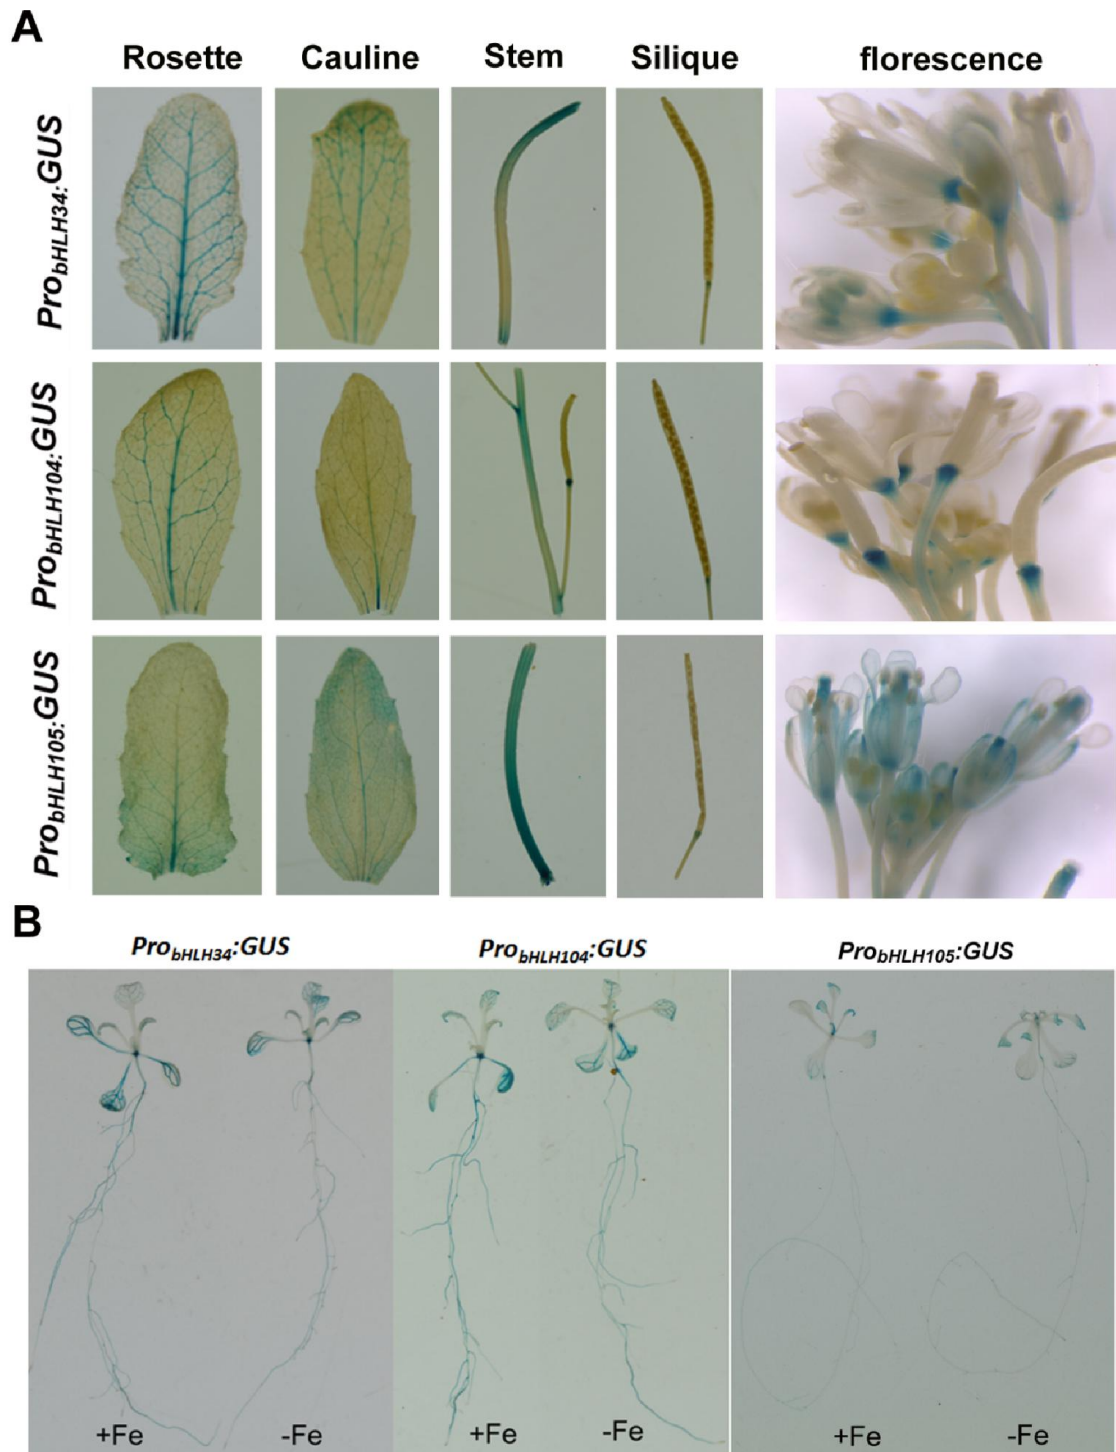

**Supplemental Figure 14.** GUS staining of *Pro<sub>bHLH34</sub>:GUS*, *Pro<sub>bHLH104</sub>:GUS* and *Pro<sub>bHLH105</sub>:GUS* plants.

(A) GUS staining of rosette leaves, cauline leaves, stems, siliques and inflorescences was shown.

(B) GUS staining of seedlings treated with +Fe or –Fe for three days. Two-week-old seedlings grown on +Fe media were transferred to +Fe media or –Fe media for 3 days. The whole seedlings were used for GUS staining.

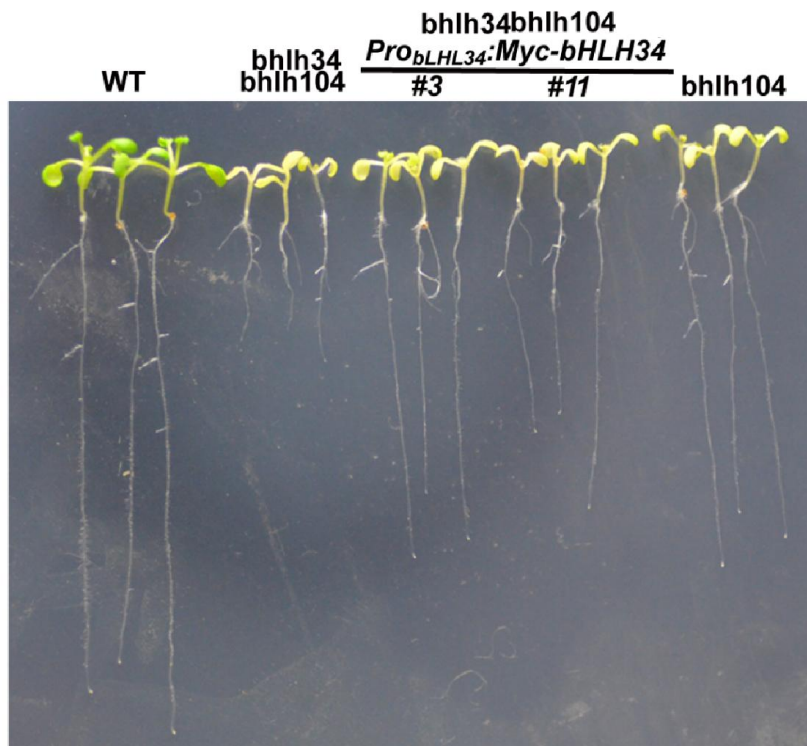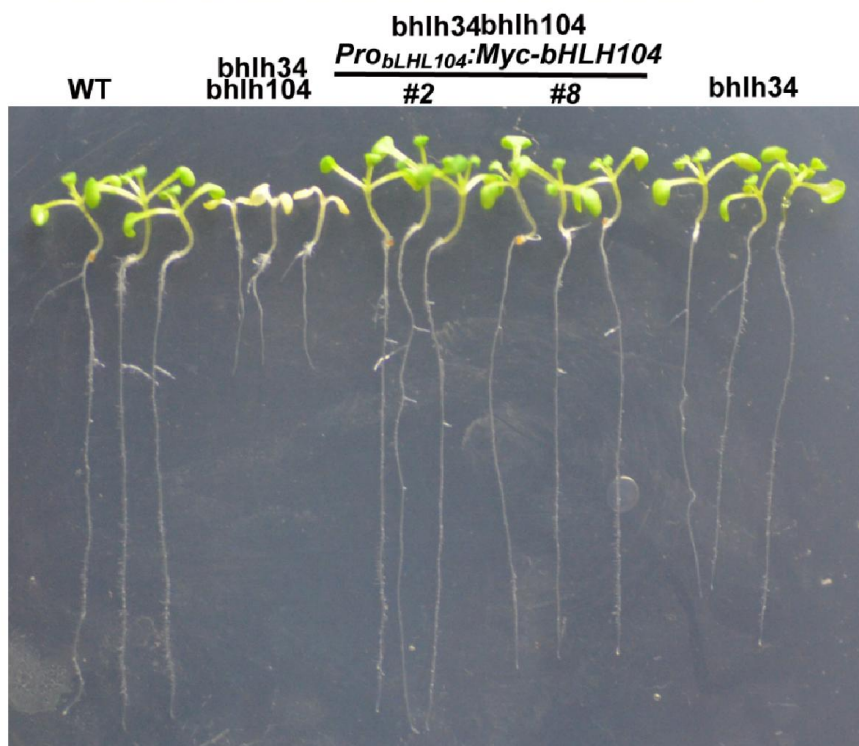

**Supplemental Figure 15.** Partially complementation of *bhlh34bhlh104* double mutants by *Pro<sub>bLHL34</sub>:Myc-bHLH34* and *Pro<sub>bLHL104</sub>:Myc-bHLH104*. 10-day-old seedlings grown on -Fe media were shown.

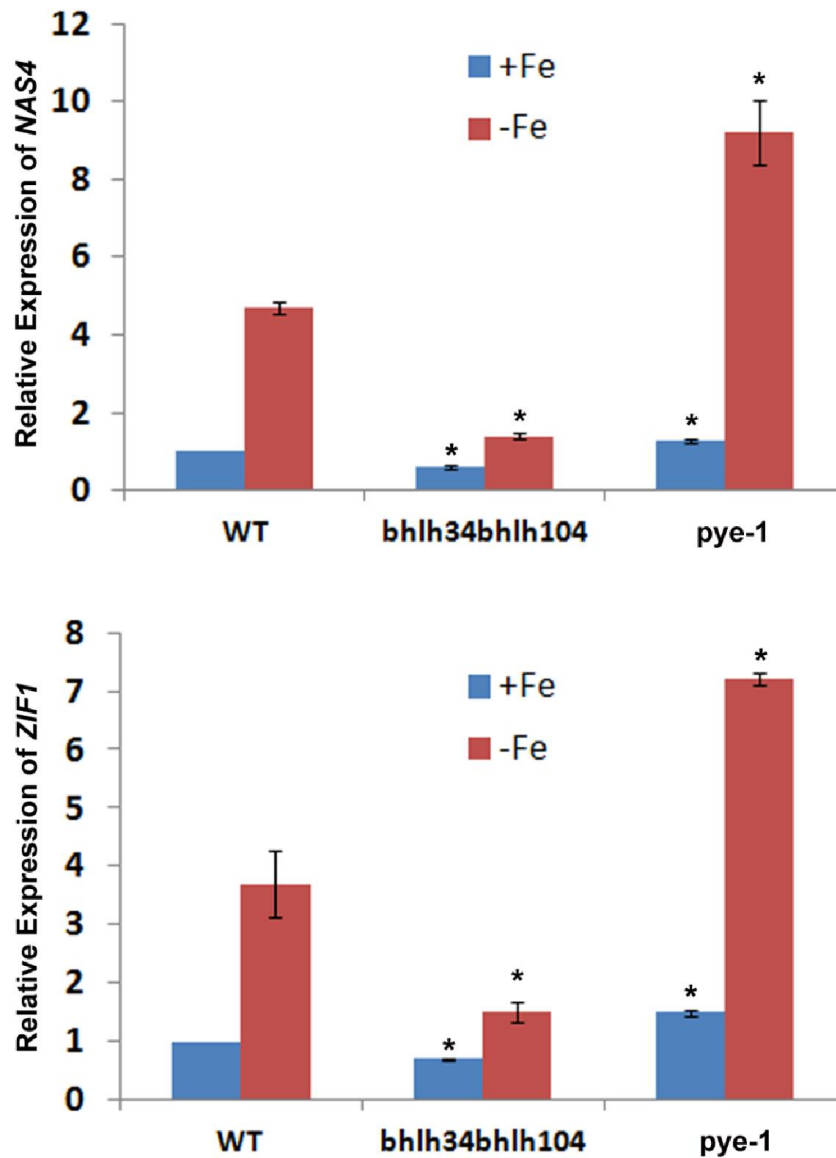

**Supplemental Figure 16.** Expression of *NAS4* and *ZIF1* in *bhlh34bhlh104* and *pye-1* mutants. The data represent means ( $\pm$ SD) of three technical repeats from one of three biological repeats. Significant differences from the wild type are indicated by \* ( $P < 0.05$ ).

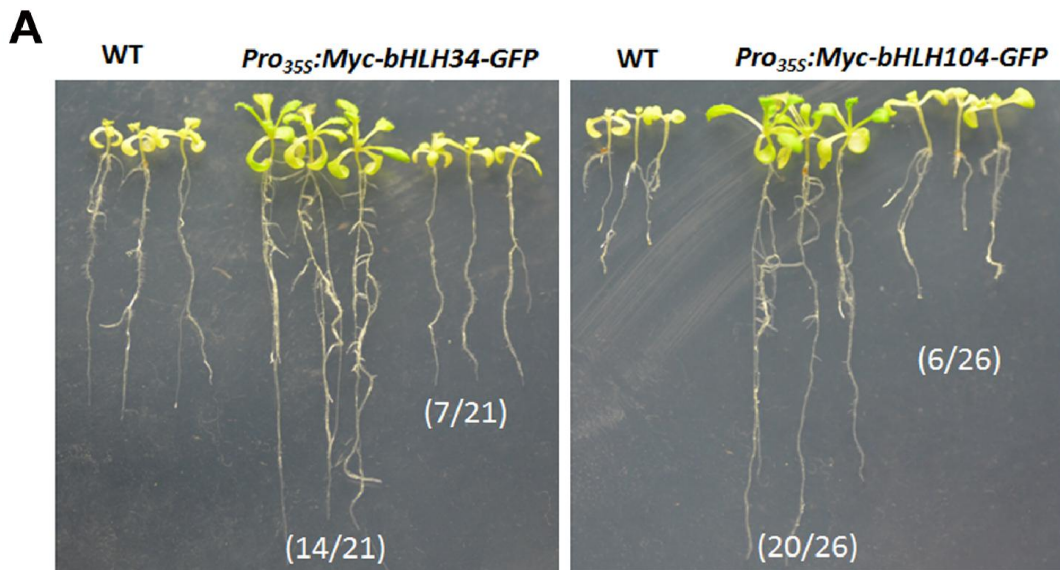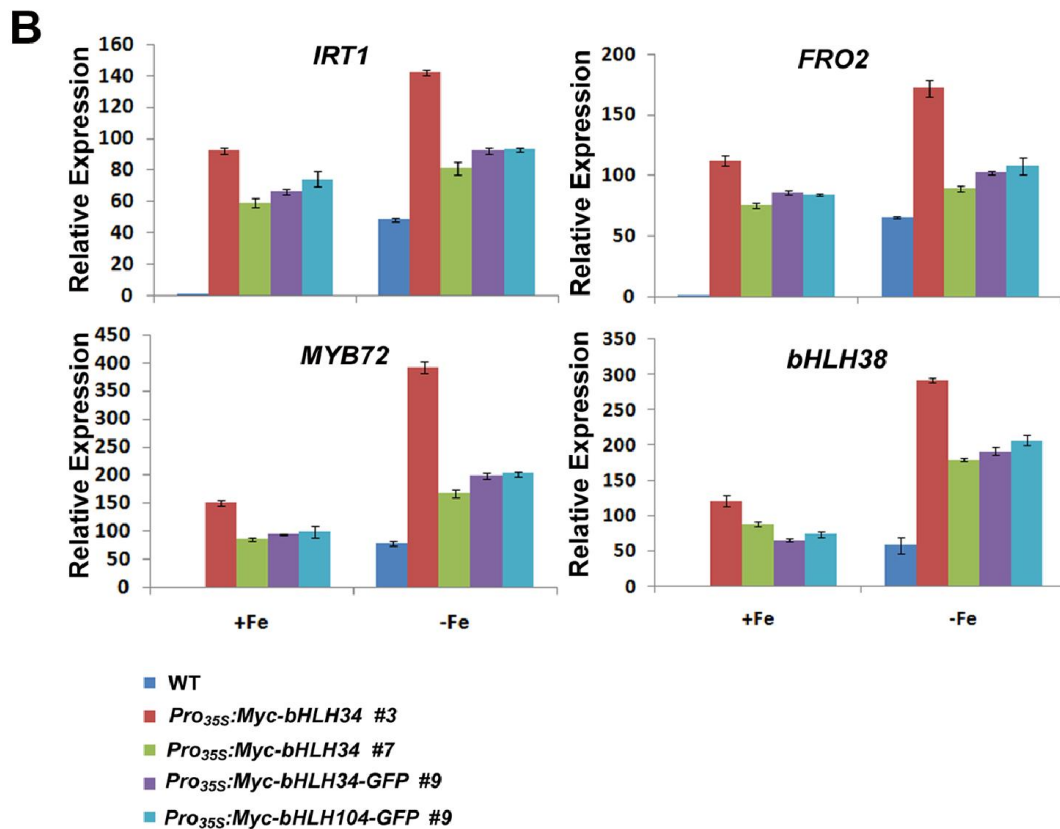

**Supplemental Figure 17.** Phenotypes of *Pro*<sub>35S</sub>:Myc-bHLH34-GFP and *Pro*<sub>35S</sub>:Myc-bHLH104-GFP plants.

(A) 10-day-old seedlings grown on -Fe media were shown. The number indicates the frequency of transgenic plants with the corresponding phenotypes.

(B) Expression of Fe-deficient responsive genes in different transgenic plants. Plants were grown on +Fe media for 10 days, then transferred to +Fe or -Fe media for 3 days. RNA was prepared from root tissues.



**Supplemental Table 1.** Primers used in this paper.

---

**Mutant screening**

bhlh34-A TGGAAATCTTGAGCAAGTTTGT  
bhlh34-B ATCACATCAAACAACGAAATGG  
bhlh104-A TGAATCTGTGATGGTTGTTGATAGG  
bhlh104-B GGAAGAATCCTAAACCAAGTGATTC  
bhlh105-A CATGAATACTTGCCACTATACCGA  
bhlh105-B CAGGCACACACAGTTGACTTTAGAT

**Promoter**

ProbHLH34-F TATGTCGACACCAAAAAGATACTCTCAGCCTCTCAC  
ProbHLH34-R TATGGATCCCAGAAGAAGAAGCAGAGAATGCAGAAC  
ProbHLH104-F TATGTCGACGTTTTCTTTAATAATCAGTAACAGCTACGT  
ProbHLH104-R TATGAGCTCTTGAGAGTCTCCAAACAAATTTGAG  
ProbHLH105-F TTTGGATCCATGGCAAAATTCATGCCTTCA  
ProbHLH105-R TTTGAGCTCTCCGGAAACTTCCACCGGT  
ProbHLH38-F ATAGTCGACTTAATTTTCGCCTAGACTTTGAATG  
ProbHLH38-R ATAGGATCCTTTTTTGCTTAATCAAGGACAAGGT  
ProbHLH39-F ATAGGATCCATGAAGTAAAAGATGAGCGGC  
ProbHLH39-R ATAGAGCTCTTTTGCTTACTAAGGACAAGTATTGTAGA  
ProbHLH100-F ATAGTCGACGGAAATTTAGAGTTGAACCTAGGCA  
ProbHLH100-R ATAGGATCCTTTGAGTTTTAGATAGTTACTCTGTTCTTT  
ProbHLH101-F ATAGTCGACAAGTGGCCGATGAATGATGTG  
ProbHLH101-R ATAGGATCCTGTTGAAGCAGAGTACCATTCTTG  
ProFIT-F ATAGTCGACCGTTTTTCAAATTTGTAACCGATA  
ProFIT-R ATAGGATCCTTGTGTGTTTTTGTCAATGAAGAAA

**Overexpression**

bHLH34-Myc-F ATACCCGGGATGGAGGAGCAGAAGCTGATCTCAGAGGAGGACCTGtatccatcaatcgaagacgatg  
bHLH34-Flag-F ATACCCGGGATGGACTACAAAGACGATGACGACAAGtatccatcaatcgaagacgatg  
bHLH34-R ATAGGATCCAGCAACAGGAGGAAGATTTTTG  
bHLH104-Myc-F ATACCCGGGATGGAGGAGCAGAAGCTGATCTCAGAGGAGGACCTGTATCCTTCTCTCGACGATGATT  
bHLH104-R AAAGTCGACAAACAATTGAGAGTTTAAGCAGCA  
MYC2-Myc-F AACCCGGGATGGAGGAGCAGAAGCTGATCTCAGAGGAGGACCTGATGACTGATTACCCGGCTACAACC  
MYC2-R TTACTAGTTAACCGATTTTTGAAATCAAACCTG  
bHLH101-F ATAGGATCCATGGAGTATCCATGGCTGCAG  
bHLH101-R ATAGTCGACTTATGATTGGCGTAATCCCAAG

**BiFC**

YN-bHLH34-F ATAATTTAAATATGTATCCATCAATCGAAGACGATG  
YN-bHLH34-R ATAGGATCCAGCAACAGGAGGAAGATTTTTG  
YC-bHLH104-F ATATCTAGAATGTATCCTTCTCTCGACGATGATT  
YC-bHLH104-R ATAGGATCCAGCAGCAGGAGGCCTGA

**Yeast**

BD-bHLH34-F ATAGAATTCGGTGTAGTGGAATCAATTCTTCGT  
BD-bHLH34-R ATAGGATCCTTAAGCAACAGGAGGAAGATTTTTG  
AD-bHLH34-F ATAGAATTCatgtatccatcaatcgaagacgatg

|              |                                    |
|--------------|------------------------------------|
| AD-bHLH34-R  | ATAGGATCCtTaagcaacaggaggaagatttTtg |
| BD-bHLH104-F | ATAGAATTCGACGATTGCTCCAGAAAGCG      |
| BD-bHLH104-R | ATAGGATCCtTaagcaGcaggaggCCtGA      |
| AD-bHLH104-F | ATAGAATTCATGTATCCTTCTCTCGACGATGA   |
| AD-bHLH104-R | ATAGGATCCtTAAGCAGCAGGAGGCCTGA      |
| BD-bHLH105-F | TTTGAATTCATGGTGTCAACCGAAAACG       |
| BD-bHLH105-R | TTTGTGACTTAAGCAACAGGAGGACGAAG      |
| AD-bHLH105-F | TTTGAATTCATGGTGTCAACCGAAAACG       |
| AD-bHLH105-R | TTTGTGACTTAAGCAACAGGAGGACGAAG      |

**qRT-PCR**

|            |                              |
|------------|------------------------------|
| qbHLH34-F  | TCGTCATCTGTTGGAGCTGT         |
| qbHLH34-R  | GTTTCTCGCGACAGGCTTTG         |
| qbHLH104-F | CAGAGGAGGAGGAACTAAAGCG       |
| qbHLH104-R | CGGTTTATCAGTCTTAGGAGTCCTC    |
| qIRT1-F    | GCCCCGCAAATGATGTTACC         |
| qIRT1-R    | TCCAATGACCACCGAGTGAA         |
| qFRO2-F    | ATCGAAAGTCGCCACACCAT         |
| qFRO2-R    | GAGCCACAAACATCGCCAAG         |
| qMYB10-F   | GGGGAAATCTTGGTGGAGCA         |
| qMYB10-R   | AGGAGGAACCTGGCTATCGT         |
| qMYB72-F   | TCGAGAGGTAACCAAATCGCA        |
| qMYB72-R   | CAGCTGTCTCCTCAAGTCGG         |
| qbHLH38-F  | ACGGTGCCGGAGATAACCTA         |
| qbHLH38-R  | GTCGGTCACGTTCACTAGCA         |
| qbHLH39-F  | CCGTTTATGTCTTCTGCCT          |
| qbHLH39-R  | GCCTTTGGTGGCTGCTTAAC         |
| qbHLH100-F | CTCCCACCAATCAAACGAAGAAG      |
| qbHLH100-R | TGTTTTGGTCGGTGTAACGAG        |
| qbHLH101-F | AAGAAGATCGAGGAGCGGTG         |
| qbHLH101-R | AGAGGCAAGAGAGCACGAAG         |
| qFIT-F     | CCAACACCTGTCGATGACCT         |
| qFIT-R     | TTCACCACCGGCTCTAACAC         |
| qNAS2-F    | CGACGTGGTTAATTCGGTGG         |
| qNAS2-R    | CATAACCACACACCGTCCGA         |
| qNAS4-F    | CTCCGTCGTTCTTGCCTCT          |
| qNAS4-R    | TTCGCTGATGGGTCGATGTC         |
| qZIF1-F    | CGATATGCTGGGGCACTGAT         |
| qZIF1-R    | CCGGTTATGGCAGACACACT         |
| qFRD3-F    | TTGAGCATAAGGCTTTGGG          |
| qFRD3-R    | GAAGATGGGGTTCGAGAACTATG      |
| qOPT3-F    | AAGCTTACTATAAACAGAGCCTTAGCTT |
| qOPT3-R    | ACAGGATCAACAAGGTACCTCCTC     |
| qPYE-F     | CAGGACTTCCCATTTTCCAAG        |
| qPYE-R     | CTTGTGTCTGGGGATCAGGTT        |

|         |                       |
|---------|-----------------------|
| qACT2-F | TGTGCCAATCTACGAGGGTTT |
| qACT2-R | TTCCCGCTCTGCTGTTGT    |
| qGFP-F  | CACTACCAGCAGAACACCCC  |
| qGFP-R  | GAACTCCAGCAGGACCATGT  |
| qGUS-F  | TACGGCGTGGATACGTTAGC  |
| qGUS-R  | GGTCGAAAATCGGCGAAAT   |

---
